# Supplementary material
Source: PubMed Central journal article supplement (PMC4751360)
Supplement: supp_M115.703710_Supplemental_Table1.pdf [file supp_M115.703710_Supplemental_Table1.pdf]

Supplementary Table 1

Supplementary Table 1: Phenotypic information on patients with missense mutations affecting the N- and C-terminal extended region of the NFI GRD and evaluation of the pathogenicity of the missense variants

| Missense Mutation                                | Protein      | RefSeq      | Proband | Age Group   | Gender | NIH Criteria | C.N.M.               | Feeding | Loss | >5 c.NFs | PNF       | Spinal NF | OPC | Osses Lesion | Development           | Family History | Comments                                                                                                                                                                |
|--------------------------------------------------|--------------|-------------|---------|-------------|--------|--------------|----------------------|---------|------|----------|-----------|-----------|-----|--------------|-----------------------|----------------|-------------------------------------------------------------------------------------------------------------------------------------------------------------------------|
| <b>N-terminal extended region of the NFI-GRD</b> |              |             |         |             |        |              |                      |         |      |          |           |           |     |              |                       |                |                                                                                                                                                                         |
| 3604G-T                                          | p.Ala120Ser  | UAB-R9745   | Y       | 0-28 years  | F      | -            | +5 irregular borders | LA      | n    | n        | n         | ?         | ?   | n            | normal                | RS             | also found in the father who carries only 1 very small CAL                                                                                                              |
| 3610G-T                                          | p.Arg1204Leu | UAB-R1357   | Y       | 1-28 years  | F      | -            | +5                   | n       | n    | n        | n         | ?         | ?   | n            | normal                | RS             | frontal bossing                                                                                                                                                         |
| 3610G-T                                          | p.Arg1204Leu | UAB-R1347   | Y       | 0-28 years  | F      | -            | +5                   | n       | n    | n        | n         | ?         | ?   | n            | normal                | RS             | ADD, LD, speech delay                                                                                                                                                   |
| 3610G-T                                          | p.Arg1204Leu | UAB-R9793R  | Y       | 36 years    | M      | -            | +5                   | n       | n    | n        | n         | ?         | ?   | n            | normal                | F              | familial CALMs                                                                                                                                                          |
| 3610G-T                                          | p.Arg1204Leu | UAB-R0782   | Y       | 0-28 years  | F      | +            | +5                   | BAK1    | ?    | NS       | NS        | NS        | ?   | n            | NS                    | F              | Noonan phenotype: short stature, hyperreflexia, webbed neck                                                                                                             |
| 3610G-T                                          | p.Arg1204Leu | UAB-R1164   | Y       | 0-28 years  | M      | +            | +5                   | LI      | ?    | NS       | NS        | NS        | ?   | n            | ADD, LD               | RS             |                                                                                                                                                                         |
| 3610C-G                                          | p.Arg1204Gly | UAB-R5348   | Y       | 27-35 years | F      | -            | +5                   | n       | n    | n        | n         | ?         | ?   | n            | LD                    | F              | LD, delayed early motor and speech milestones                                                                                                                           |
| 3610C-G                                          | p.Arg1204Gly | UAB-R5354   | Y       | 0-28 years  | M      | -            | +5                   | R1&LA   | ?    | n        | n         | ?         | ?   | n            | relative macrocephaly | F              |                                                                                                                                                                         |
| 3610C-G                                          | p.Arg1204Gly | UAB-R9917   | Y       | 0-28 years  | M      | -            | +5                   | n       | n    | NS       | NS        | NS        | ?   | n            | NS                    | F              |                                                                                                                                                                         |
| 3610C-G                                          | p.Arg1204Gly | UAB-R0191   | Y       | 0-28 years  | M      | +            | +5                   | BAK1    | ?    | ?        | NS        | NS        | ?   | n            | no by MRI             | F              | father also CALs                                                                                                                                                        |
| 3610C-G                                          | p.Arg1204Gly | UAB-R1921   | Y       | 0-28 years  | F      | +            | +5                   | BAK1    | B    | n        | n         | ?         | ?   | n            | LD                    | PVS            |                                                                                                                                                                         |
| 3610C-G                                          | p.Arg1204Gly | UAB-R0884   | Y       | 0-28 years  | M      | -            | +5                   | n       | n    | n        | n         | ?         | ?   | n            | NS                    | F              | possible Noonan (low set ears)                                                                                                                                          |
| 3610C-G                                          | p.Arg1204Gly | UAB-R3947   | Y       | 0-28 years  | F      | +            | +5                   | BA      | ?    | n        | n         | ?         | ?   | n            | abnormal LD           | PVS            | abnormal LD, autism, PDD                                                                                                                                                |
| 3610C-G                                          | p.Arg1204Gly | UAB-R383    | Y       |             | F      | +            | +5                   | NS      | ?    | yes      | n         | n         | NS  | NS           | NS                    | unknown        |                                                                                                                                                                         |
| 3610C-G                                          | p.Arg1204Gly | UAB-R0690   | Y       | 36 years    | F      | +            | +5                   | BA      | n    | n        | n         | ?         | ?   | n            | normal                | F              | brother also CALs                                                                                                                                                       |
| 3610C-G                                          | p.Arg1204Gly | UAB-R2353   | Y       | 19-26 years | M      | +            | +5                   | BI      | ?    | ?        | ?         | ?         | ?   | n            | no by MRI             | unknown        | per 4-yr daughter has <4 CALMs and a LD, no mutation                                                                                                                    |
| 3610C-G                                          | p.Arg1204Gly | UAB-R5152   | Y       | 12-18 years | M      | +            | +5                   | NS      | B    | n        | n         | ?         | ?   | n            | LD                    | unknown        | possible Noonan                                                                                                                                                         |
| 3610C-G                                          | p.Arg1204Gly | UAB-R1252   | Y       | 0-28 years  | M      | +            | +5                   | ?       | ?    | ?        | ?         | ?         | ?   | n            | LD                    | unknown        | systemic stenosis                                                                                                                                                       |
| 3610C-G                                          | p.Arg1204Gly | UAB-R1611   | Y       | 0-28 years  | M      | +            | +5                   | BAK1    | ?    | ?        | ?         | ?         | ?   | n            | short stature         | DD             | unknown                                                                                                                                                                 |
| 3610C-T                                          | p.Arg1204Trp | UAB-R01581  | Y       | 0-28 years  | M      | +            | +5                   | n       | n    | n        | n         | ?         | ?   | n            | NS                    | F              |                                                                                                                                                                         |
| 3610C-T                                          | p.Arg1204Trp | UAB-R0157   | Y       | 0-28 years  | F      | +            | +5                   | BA      | n    | n        | n         | ?         | ?   | n            | NS                    | F              |                                                                                                                                                                         |
| 3610C-T                                          | p.Arg1204Trp | UAB-R015    | Y       | 36 years    | F      | +            | +5                   | IRI     | BA   | n        | n         | ?         | ?   | n            | NS                    | F              |                                                                                                                                                                         |
| 3610C-T                                          | p.Arg1204Trp | UAB-R7214   | Y       | 0-28 years  | M      | -            | +5                   | n       | n    | n        | n         | ?         | ?   | n            | winging of scapulae   | unknown        | gross motor issues, speech therapy, macrocephaly                                                                                                                        |
| 3621F-G                                          | p.Leu1281Trp | UAB-R2178   | Y       | 27-35 years | F      | +            | +5                   | 2 fam   | ?    | n        | n         | ?         | ?   | n            | scotomas              | F              | melanoma on the back                                                                                                                                                    |
| 3621F-G                                          | p.Leu1281Trp | UAB-R2071   | Y       | 0-28 years  | F      | -            | +5                   | n       | n    | n        | n         | ?         | ?   | n            | normal                | F              |                                                                                                                                                                         |
| 3621F-G                                          | p.Leu1281Trp | UAB-R785    | Y       | 0-28 years  | M      | -            | +5                   | n       | n    | n        | n         | ?         | ?   | n            | hyperactivity, LD     | unknown        | Noonan phenotype present: low set ears, midface hypoplasia, hyperreflexia                                                                                               |
| 3632F-G                                          | p.Leu1211Arg | UAB-R7694R2 | Y       | 27-35 years | M      | +            | +5                   | n       | n    | n        | n         | ?         | ?   | n            | no by MRI             | F              | had remedial reading when younger                                                                                                                                       |
| 3632F-G                                          | p.Leu1211Arg | UAB-R7694R1 | Y       | 27-35 years | F      | +            | +5                   | n       | n    | n        | n         | ?         | ?   | n            | no by MRI             | F              | had remedial reading when younger                                                                                                                                       |
| 3632F-G                                          | p.Leu1211Arg | UAB-R7694   | Y       | 0-28 years  | M      | +            | +5                   | n       | n    | n        | n         | NS        | ?   | n            | macrocephaly          | F              | abnormal development                                                                                                                                                    |
| 3639_3641delAAAT                                 | p.Met1215del | UAB-R0757   | Y       | 0-28 years  | F      | +            | +5                   | LI      | ?    | ?        | NS        | NS        | NS  | NS           | NS                    | RS             | proband carries two NFI variants in trans: p.Leu1211Arg was found in the affected father; p.Gly910Arg was found in the unaffected mother and 14.4% healthy gene variant |
| 3639_3641delAAAT                                 | p.Met1215del | UAB-R8947   | Y       | 0-28 years  | F      | +            | +5                   | 1-2 RA  | ?    | ?        | NS        | NS        | NS  | NS           | NS                    | RS             | possible Juvenile Xanthogranuloma                                                                                                                                       |
| 3639_3641delAAAT                                 | p.Met1215del | UAB-R3694   | Y       | 0-28 years  | F      | +            | +5                   | BGA7    | ?    | n        | n         | ?         | ?   | n            | LD                    | RS             |                                                                                                                                                                         |
| 3639_3641delAAAT                                 | p.Met1215del | UAB-R3912   | Y       | 36 years    | M      | +            | +5                   | BAK1    | B    | ?        | ?         | ?         | ?   | n            | LD                    | RS             |                                                                                                                                                                         |
| 3650A-G                                          | p.Asp1217Gly | UAB-R3763R  | Y       | 27-35 years | M      | +            | +5                   | A       | ?    | NS       | NS        | NS        | NS  | NS           | NS                    | F              |                                                                                                                                                                         |
| 3650A-G                                          | p.Asp1217Gly | UAB-R3763   | Y       | 0-28 years  | M      | +            | +5                   | L1&A    | ?    | n        | n         | NS        | NS  | NS           | NS                    | F              | abnormal development                                                                                                                                                    |
| 3650A-G                                          | p.Asp1217Gly | UAB-R35282  | Y       | 0-28 years  | M      | +            | +5                   | I       | ?    | NS       | n         | ?         | ?   | n            | no by MRI             | F              | hyperactivity                                                                                                                                                           |
| 3650A-G                                          | p.Asp1217Gly | UAB-R35281  | Y       | 0-28 years  | F      | -            | +5                   | I       | ?    | NS       | NS        | NS        | NS  | NS           | NS                    | F              | short stature, Noonan??                                                                                                                                                 |
| 3650A-G                                          | p.Asp1217Gly | UAB-R3513   | Y       | 0-28 years  | M      | +            | +5                   | n       | n    | n        | n         | ?         | ?   | n            | NS                    | F              | normal                                                                                                                                                                  |
| 3650A-G                                          | p.Asp1217Gly | UAB-R3186   | Y       | 0-28 years  | F      | +            | +5                   | BAK1    | ?    | n        | n         | ?         | ?   | n            | NS                    | F              | normal                                                                                                                                                                  |
| 3650A-G                                          | p.Asp1217Gly | UAB-R3185   | Y       | 0-28 years  | F      | +            | +5                   | BAK1    | ?    | n        | n         | ?         | ?   | n            | NS                    | F              | normal                                                                                                                                                                  |
| 3650A-G                                          | p.Asp1217Gly | UAB-R3182   | Y       | 0-28 years  | F      | +            | +5                   | n       | n    | n        | n         | NS        | NS  | NS           | NS                    | F              | NS                                                                                                                                                                      |
| 3650A-G                                          | p.Asp1217Gly | UAB-R23181  | Y       | 0-28 years  | M      | +            | +5                   | BAK1    | ?    | n        | n         | ?         | ?   | n            | NS                    | F              | NS                                                                                                                                                                      |
| 3650A-G                                          | p.Asp1217Gly | UAB-R23181  | Y       | 27-35 years | F      | +            | +5                   | BAK1    | ?    | ?        | NS        | NS        | ?   | n            | mild scoliosis        | F              | normal                                                                                                                                                                  |
| 3650A-G                                          | p.Asp1217Gly | UAB-R2381   | Y       | 27-35 years | F      | +            | +5                   | bil ax  | ?    | ?        | subdermal | n         | ?   | n            | ?                     | F              | F                                                                                                                                                                       |
| 3650A-G                                          | p.Asp1217Gly | UAB-R9707   | Y       | 0-28 years  | M      | -            | +5                   | n       | n    | n        | n         | ?         | ?   | n            | normal                | S              | proband to be de novo, but father with 3 large CALs and mild scoliosis                                                                                                  |
| 3650A-G                                          | p.Asp1217Gly | UAB-R1197   | Y       | 0-28 years  | F      | +            | +5                   | BAK1    | ?    | NS       | NS        | NS        | NS  | NS           | NS                    | unknown        |                                                                                                                                                                         |

| INS/BAC: 100% | Human Genome Database (ClinVar) | LOVD                                    | SIFT               | McIntosh                | Polyphen                  | Conservation | Pathogenicity Prediction                             | Functional assay      |
|---------------|---------------------------------|-----------------------------------------|--------------------|-------------------------|---------------------------|--------------|------------------------------------------------------|-----------------------|
| EA: 0.02%     | absent                          | absent                                  | tolerated (0.22)   | Disease Causing (p.1.0) | benign (0.346)            | 99           | class 1 (benign)                                     | normal interaction    |
| absent        | absent                          | absent                                  | deleterious (0.02) | Disease Causing (p.1.0) | probably damaging (0.992) | 102          | class 3 (variant of uncertain clinical significance) | disrupted interaction |
| absent        | present (K&J, 1996)             | 3c, called pathogenic by curator        | deleterious (0.01) | Disease Causing (p.1.0) | probably damaging (0.992) | 125          | class 4 (likely pathogenic)                          | normal interaction    |
| absent        | present (Ara, 2006)             | absent                                  | deleterious (0.01) | Disease Causing (p.1.0) | probably damaging (1)     | 101          | class 3 (variant of uncertain clinical significance) | disrupted interaction |
| absent        | absent                          | absent                                  | deleterious (0.0)  | Disease Causing (p.1.0) | probably damaging (0.999) | 61           | class 3 (variant of uncertain clinical significance) | disrupted interaction |
| absent        | absent                          | absent                                  | deleterious (0.01) | Disease Causing (p.1.0) | probably damaging (0.997) | 102          | class 3 (variant of uncertain clinical significance) | normal interaction    |
| absent        | present (Lee, 2006)             | 5c, called likely pathogenic by curator | NA                 | NA                      | NA                        | NA           | class 4 (likely pathogenic)                          | disrupted interaction |
| absent        | absent                          | absent                                  | tolerated (0.1)    | Disease Causing (p.1.0) | probably damaging (0.996) | 94           | class 4 (likely pathogenic)                          | disrupted interaction |
| absent        | present (N97)                   | 2c, called pathogenic by curator        | deleterious (0.01) | Disease Causing (p.1.0) | probably damaging (1)     | 98           | class 4 (likely pathogenic)                          | disrupted interaction |
| absent        | present (Van Middles, 2014)     | 1c, called pathogenic by curator        | deleterious (0.02) | Disease Causing (p.1.0) | probably damaging (0.989) | 43           | class 4 (likely pathogenic)                          | normal interaction    |
| absent        | present (Ara, 2003)             | absent                                  | tolerated (0.23)   | Disease Causing (p.1.0) | probably damaging (0.99)  | 98           | class 3 (variant of uncertain clinical significance) | normal interaction    |

Legend:  
 + present; - absent; ? Unknown; NS not specified; M male; F female;  
 \*NIH criteria fulfilled; \*NIH criteria not fulfilled  
 1. Inguinal. A axillary. L left; R right; B bilateral  
 cNF cutaneous neurofibroma; sNF subdermal neurofibroma; LD learning difficulties;  
 RS: reported as sporadic, parents not available for testing; PVS: proven de novo by testing both unaffected parents, but no paternity/maternity testing performed; F familial  
 Classification: 3: pathogenic; 4: likely pathogenic; 3: variant of unknown significance; 2: likely benign; 1: benign

Supplementary Table 2: Phenotypic information on patients with missense mutations in the EVH1 domain of SPRED1

| missense DNA | missense protein | patient ID        | Age (y) / Gender | KUM      | Prockling | Macropsophy | Learning Difficulties | Other Findings | Family History | Reference                                            | NSF, EAC, ExAC, ESP, EAF, FAF, FAFish, FAFish | Conservation | SIFT | Mutation Taster | PhyloP | Pathogenicity | Phenotypic |
|--------------|------------------|-------------------|------------------|----------|-----------|-------------|-----------------------|----------------|----------------|------------------------------------------------------|-----------------------------------------------|--------------|------|-----------------|--------|---------------|------------|
| c.26A>T      | p.Asp9Val        | UAB-S103          | 5.5/M            | -/6      | -         | -           | -                     | -              | -              | Brens et al. 2012, dbSNP                             | -                                             | -            | -    | -               | -      | -             | -          |
| c.26A>T      | p.Asp9Val        | UAB-SPR941        | 36/F             | -/6      | -         | -           | -                     | -              | -              | newly described                                      | -                                             | -            | -    | -               | -      | -             | -          |
| c.26A>T      | p.Asp9Val        | UAB-SPR881        | 10/F             | 8        | -         | -           | -                     | -              | -              | newly described                                      | -                                             | -            | -    | -               | -      | -             | -          |
| c.26A>T      | p.Asp9Val        | UAB-SPR491        | 37/F             | -        | -         | -           | -                     | -              | -              | newly described                                      | -                                             | -            | -    | -               | -      | -             | -          |
| c.30C>A      | p.Asn10Lys       | UAB-S84           | 10/M             | -/6      | -         | -           | -                     | -              | -              | Brens et al. 2012, dbSNP                             | -                                             | -            | -    | -               | -      | -             | -          |
| c.30C>A      | p.Asn10Lys       | UAB-S133          | 2/M              | -        | -         | -           | -                     | -              | -              | newly described                                      | -                                             | -            | -    | -               | -      | -             | -          |
| c.71G>A      | p.Arg24Gln       | BISC-12           | 6/F              | 2        | -         | -           | -                     | -              | -              | newly described                                      | -                                             | -            | -    | -               | -      | -             | -          |
| c.71G>A      | p.Arg24Gln       | BISC-111          | 6/M              | 1        | -         | -           | -                     | -              | -              | newly described                                      | -                                             | -            | -    | -               | -      | -             | -          |
| c.71G>A      | p.Arg24Gln       | BISC-111          | new born/F       | 8        | -         | -           | -                     | -              | -              | newly described                                      | -                                             | -            | -    | -               | -      | -             | -          |
| c.71G>A      | p.Arg24Gln       | BISC-111          | 9 months/M       | 7        | -         | -           | -                     | -              | -              | newly described                                      | -                                             | -            | -    | -               | -      | -             | -          |
| c.71G>A      | p.Arg24Gln       | UAB-S52           | 20/F             | -/6      | -         | -           | -                     | -              | -              | newly described                                      | -                                             | -            | -    | -               | -      | -             | -          |
| c.71G>A      | p.Arg24Gln       | UAB-S119          | 37/M             | -/6      | -         | -           | -                     | -              | -              | newly described                                      | -                                             | -            | -    | -               | -      | -             | -          |
| c.71G>A      | p.Arg24Gln       | UAB-S432          | 8/F              | -/6      | -         | -           | -                     | -              | -              | newly described                                      | -                                             | -            | -    | -               | -      | -             | -          |
| c.88G>A      | p.Gly30Arg       | UAB-S46           | 7                | 7        | -         | -           | -                     | -              | -              | newly described                                      | -                                             | -            | -    | -               | -      | -             | -          |
| c.92G>T      | p.Trp31Leu       | UAB-S129          | 5.5/M            | 8        | -         | -           | -                     | -              | -              | newly described                                      | -                                             | -            | -    | -               | -      | -             | -          |
| c.93G>T      | p.Trp31Cys       | Denayer-family 3  | 15/M             | -/5      | -         | -           | -                     | -              | -              | Denayer et al. 2011                                  | -                                             | -            | -    | -               | -      | -             | -          |
| c.93G>T      | p.Trp31Cys       | Net-16            | M                | multiple | -         | -           | -                     | -              | -              | newly described here                                 | -                                             | -            | -    | -               | -      | -             | -          |
| c.93G>T      | p.Trp31Cys       | UAB-SPR061        | 11               | 16       | -         | -           | -                     | -              | -              | newly described here                                 | -                                             | -            | -    | -               | -      | -             | -          |
| c.124D>A     | p.Val42Ile       | UAB-S88           | 8                | 10       | -         | -           | -                     | -              | -              | newly described here                                 | -                                             | -            | -    | -               | -      | -             | -          |
| c.124D>A     | p.Val42Ile       | UAB-S77           | 9 months/M       | 26       | -         | -           | -                     | -              | -              | newly described here                                 | -                                             | -            | -    | -               | -      | -             | -          |
| c.124D>A     | p.Val42Ile       | UAB-SPR451        | 8/F              | -/6      | -         | -           | -                     | -              | -              | newly described here                                 | -                                             | -            | -    | -               | -      | -             | -          |
| c.131T>A     | p.Val44Asp       | Spurlock-family 6 | 60-68/M          | -        | -         | -           | -                     | -              | -              | Spurlock et al. 2009                                 | -                                             | -            | -    | -               | -      | -             | -          |
| c.184G>C     | p.Gly62Arg       | Uab-1             | 3/F              | -        | -         | -           | -                     | -              | -              | newly described here                                 | -                                             | -            | -    | -               | -      | -             | -          |
| c.221G>T     | p.Cys74Phe       | UAB-S53B4         | 7                | 7        | -         | -           | -                     | -              | -              | newly described here                                 | -                                             | -            | -    | -               | -      | -             | -          |
| c.239T>G     | p.Leu80Arg       | UAB-S78           | 11/M             | -/6      | -         | -           | -                     | -              | -              | newly described here                                 | -                                             | -            | -    | -               | -      | -             | -          |
| c.263C>A     | p.Thr81Lys       | Fp-7              | 7/M              | multiple | -         | -           | -                     | -              | -              | newly described here - LOVD, SPRED1 - Penzance Paris | -                                             | -            | -    | -               | -      | -             | -          |
| c.274T>C     | p.Trp92Arg       | UAB-S127          | 3/M              | -/6      | -         | -           | -                     | -              | -              | newly described here                                 | -                                             | -            | -    | -               | -      | -             | -          |
| c.299G>A     | p.Gly100Asp      | UAB-S104          | 62/F             | -/6      | -         | -           | -                     | -              | -              | newly described here                                 | -                                             | -            | -    | -               | -      | -             | -          |
| c.309C>T     | p.Thr102Met      | UAB-SK3-I1        | 26/F             | -/6      | -         | -           | -                     | -              | -              | newly described here                                 | -                                             | -            | -    | -               | -      | -             | -          |
| c.309C>T     | p.Thr102Met      | UAB-SK3-I11       | 11 months/F      | -/6      | -         | -           | -                     | -              | -              | newly described here                                 | -                                             | -            | -    | -               | -      | -             | -          |
| c.309C>A     | p.Thr102Lys      | UAB-S64           | 8.75/M           | -/6      | -         | -           | -                     | -              | -              | newly described here                                 | -                                             | -            | -    | -               | -      | -             | -          |
| c.309C>A     | p.Thr102Lys      | UAB-S105          | 5/M              | -/6      | -         | -           | -                     | -              | -              | newly described here                                 | -                                             | -            | -    | -               | -      | -             | -          |
| c.309C>G     | p.Thr102Arg      | UAB-S24           | 17/M             | -/6      | -         | -           | -                     | -              | -              | newly described here                                 | -                                             | -            | -    | -               | -      | -             | -          |
| c.347T>A     | p.Ile116Asn      | UAB-S110-I1       | 55/M             | -/6      | -         | -           | -                     | -              | -              | newly described here                                 | -                                             | -            | -    | -               | -      | -             | -          |
| c.347T>A     | p.Ile116Asn      | UAB-S110-I11      | 21 months/M      | -/6      | -         | -           | -                     | -              | -              | newly described here                                 | -                                             | -            | -    | -               | -      | -             | -          |

Legend:  
M male  
F female  
y years  
- unknown  
- not present  
+ present  
pathogenicity score according to Richards et al., Genetics in Medicine, 17-405-424, 2015.  
1= benign  
2= likely benign  
3= uncertain significance  
4= likely pathogenic  
5= pathogenic
